# Supplementary material
Source: Springer Nature journal article supplement (https://www.springermedizin.de/resource/supplementary/12969_2011_798_MOESM1_ESM.pdf/9593042)

# SDI Score distribution

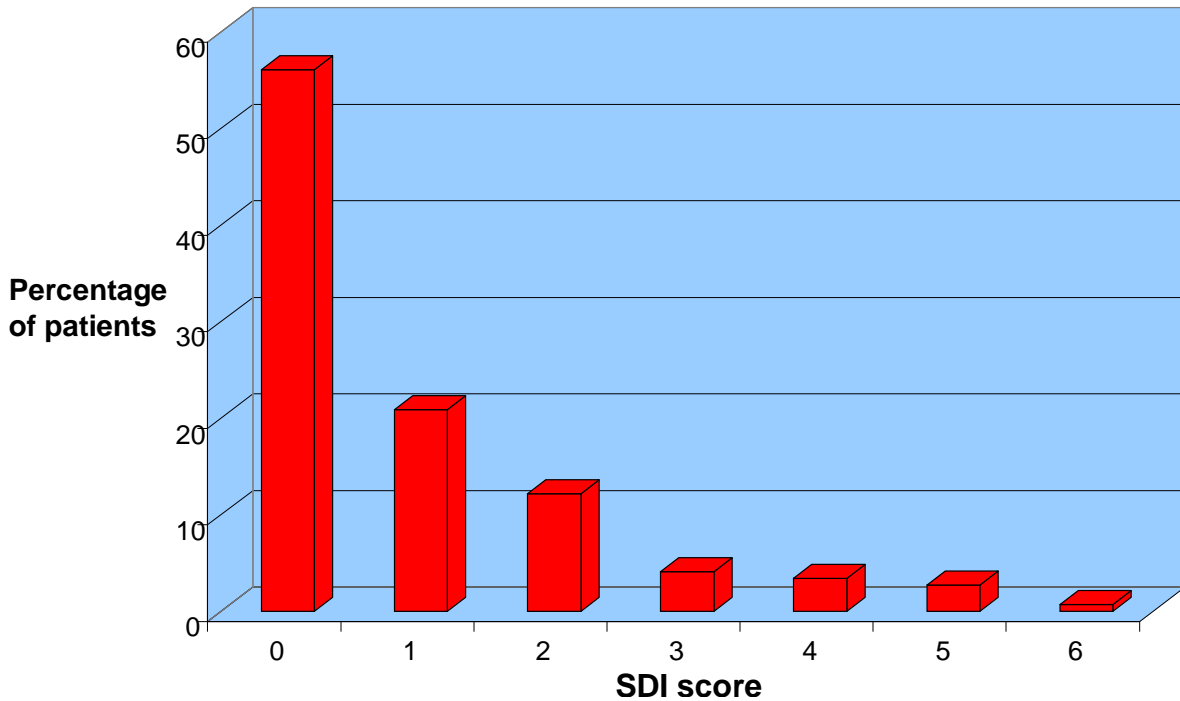

Supplement: MOESM1 [file 9593042]
